# Supplementary material for: Identification of the effect of N-glycan modification and its sialylation on proteolytic stability and glucose-stabilizing activity of glucagon-like peptide 1 by site-directed enzymatic glycosylation
Source: PubMed Central journal article supplement — RSC Adv. 2022 Nov 7;12(49):31892–9. doi: 10.1039/d2ra05872c (PMC9639207; doi:10.1039/d2ra05872c), 2022-11-07
Supplement: RA-012-D2RA05872C-s001.pdf [file RA-012-D2RA05872C-s001.pdf]

## Identification of effect of N-glycan modification and its sialylation on proteolytic stability and glucose-stabilizing activity of glucagon-like peptide 1 by site-directed enzymatic glycosylation

Huan Liu<sup>#a</sup>, Zengwei Liang<sup>#a</sup>, Yu Wang<sup>#a</sup>, Yingze Li<sup>a</sup>, Ya Wang<sup>a</sup>, Xin Guo<sup>c,d</sup>, Wanyi Guan<sup>\*b</sup>, Wei Zou<sup>\*a</sup>, Zhigang Wu<sup>\*a</sup>

<sup>a</sup> College of Food and Biology, Hebei University of Science and Technology, Shijiazhuang, Hebei 050018, China

<sup>b</sup> Ministry of Education Key Laboratory of Molecular and Cellular Biology, Hebei Key Laboratory of Molecular and Cellular Biology, College of Life Sciences, Hebei Normal University, Shijiazhuang, Hebei 050024, China

<sup>c</sup> Research Center, Hebei Province hospital of Chinese Medicine, Affiliated Hospital of Hebei University of Traditional Chinese Medicine, Shijiazhuang, Hebei 050011, China

<sup>d</sup> Department of Pathology and Laboratory Medicine, Department of Pathology, Kanazawa Medical University, Uchinada, Ishikawa 920-0293, Japan

## Supporting Information

### Table of Contents

|                                                                                                           |     |
|-----------------------------------------------------------------------------------------------------------|-----|
| Fig. S1 HPLC chromatographs and ESI-MS spectra of glycosylated GLP-1 analogues                            | S2  |
| Table S1 Retention times, theoretical and observed molecular weights of glycosylated GLP-1 analogues      | S11 |
| Table S2 The calculated ratio of secondary structure elements for native GLP-1 and glycan-GLP-1 analogues | S11 |
| Fig. S2 Degradation profiles of GLP-1 isoforms incubated with DPP-IV                                      | S12 |
| Fig. S3 Degradation profiles of GLP-1 isoforms incubated with mouse serum                                 | S17 |
| Fig. S4 GLP-1-bound extracellular domain (ECD) of the GLP-1 receptor (GLP-1R)                             | S22 |

**Fig. S1** HPLC chromatographs and ESI-MS spectra of glycosylated GLP-1 analogues  
**Glc-GLP-1-1**

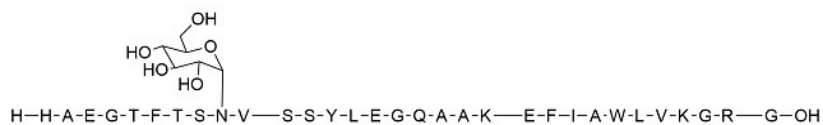

**HPLC-C18-UV:** The column (4.6 mm × 250 mm) was eluted with a linear gradient of 20-60% acetonitrile (ACN) containing 0.1% TFA within 35 min at a flow rate of 1 mL/min.  $T_R = 17.107$  min.

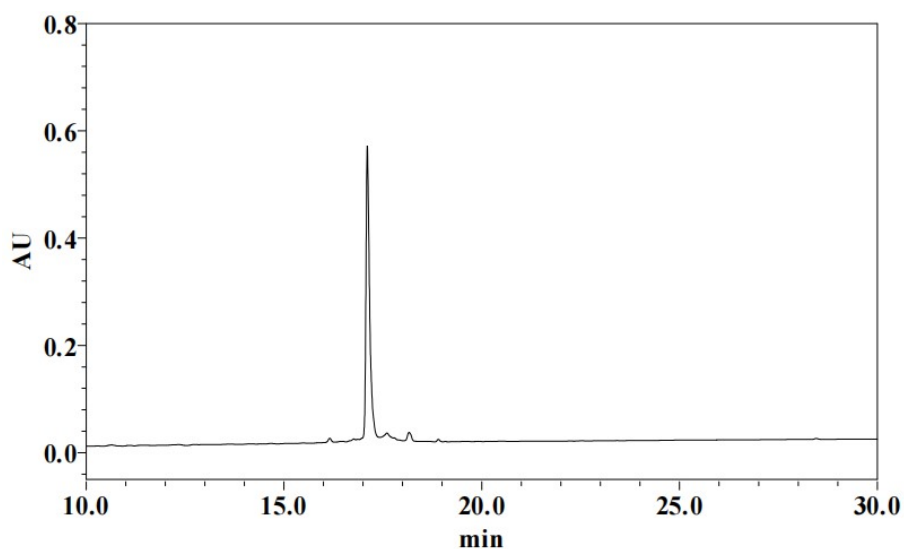

**MS:** calculated 3514.7369; found 3515.4704.

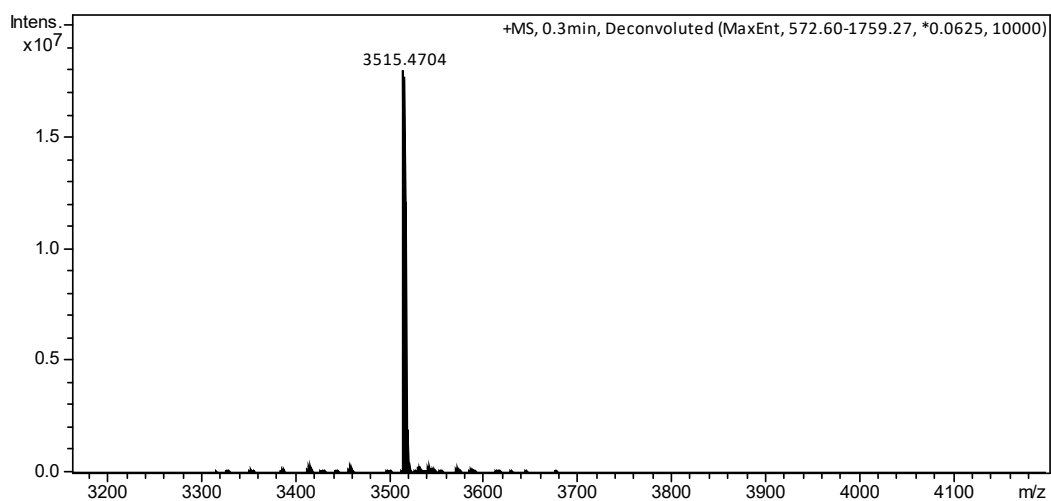

## Glycan-GLP-1-1(G2)

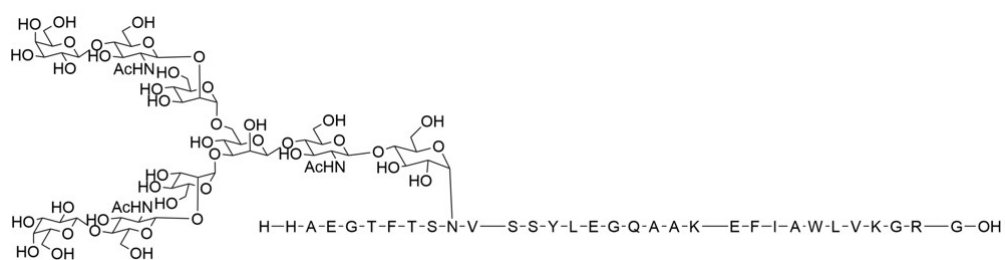

**HPLC-C18-UV:** The column (4.6 mm × 250 mm) was eluted with a linear gradient of 20-60% acetonitrile (ACN) containing 0.1% TFA within 35 min at a flow rate of 1 mL/min.  $T_R = 16.087$  min.

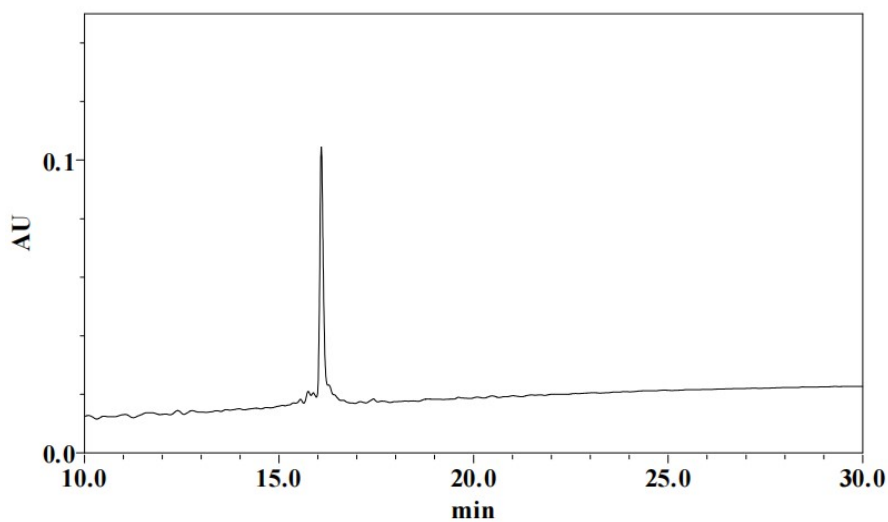

**MS:** calculated 4935.2391; found 4936.2523.

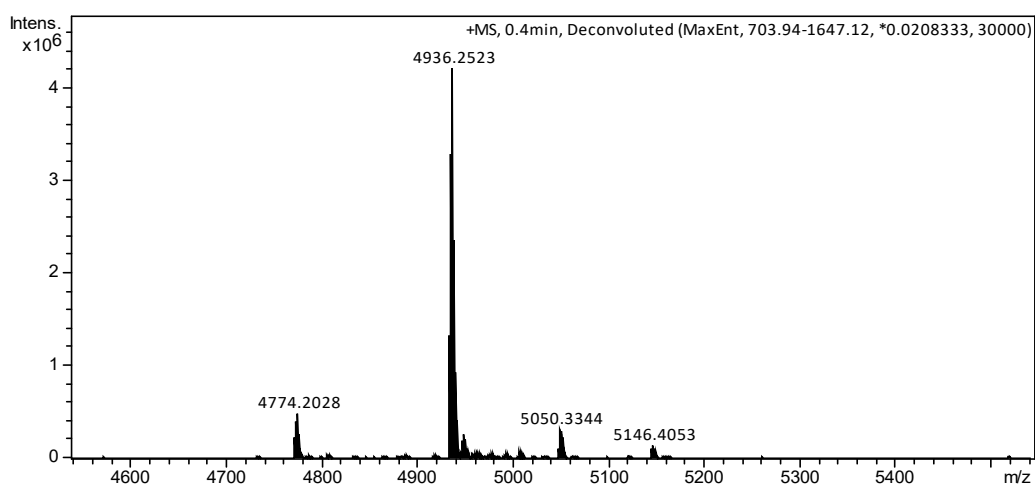

## Glycan-GLP-1-1(G2S2)

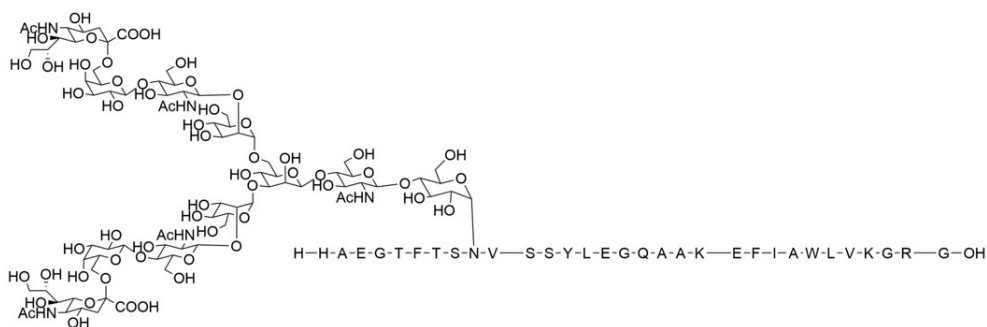

**HPLC-C18-UV:** The column (4.6 mm × 250 mm) was eluted with a linear gradient of 20-60% acetonitrile (ACN) containing 0.1% TFA within 35 min at a flow rate of 1 mL/min.  $T_R = 15.599$  min.

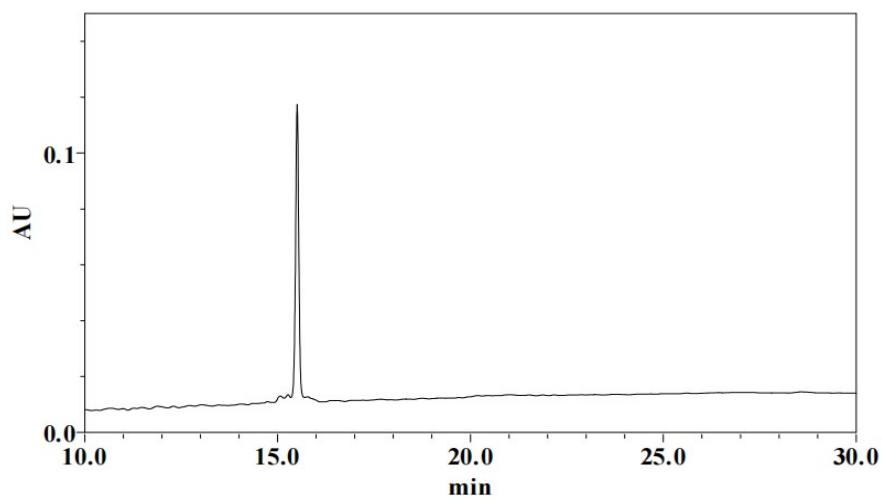

**MS:** calculated 5517.4299; found 5518.4478.

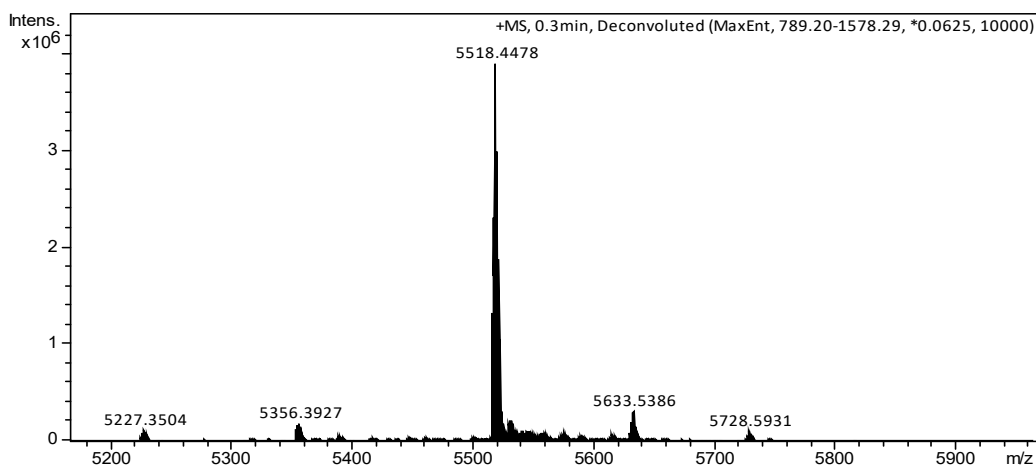

## Glc-GLP-1-3

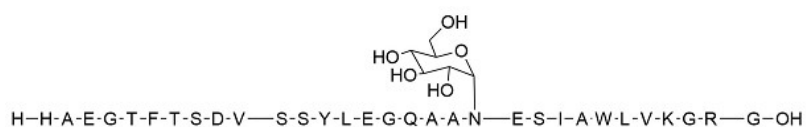

**HPLC-C18-UV:** The column (4.6 mm × 250 mm) was eluted with a linear gradient of 20-60% acetonitrile (ACN) containing 0.1% TFA within 35 min at a flow rate of 1 mL/min.  $T_R = 13.345$  min.

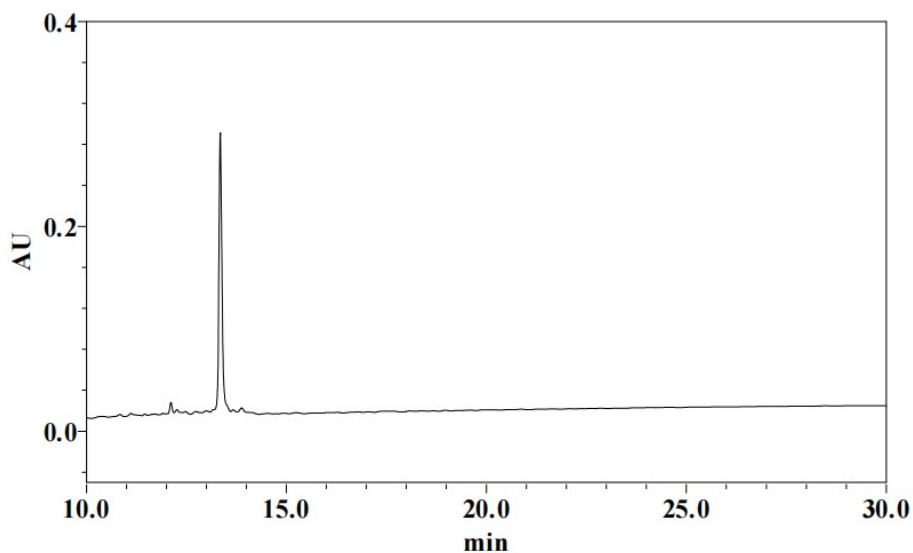

**MS:** calculated 3441.6325; found 3442.6382.

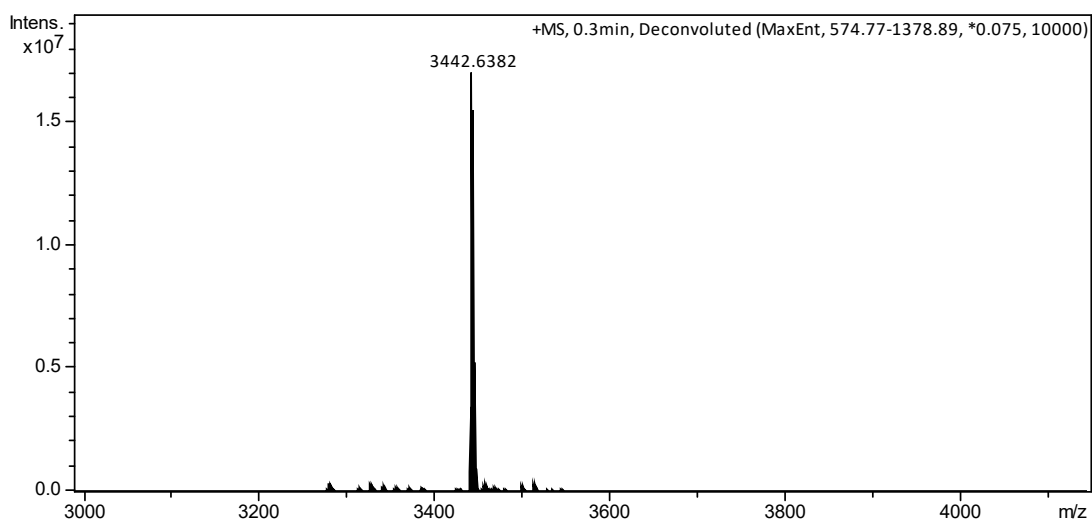

## Glycan-GLP-1-3(G2)

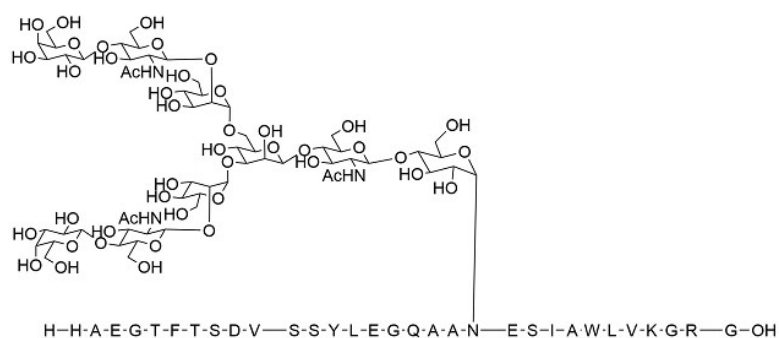

**HPLC-C18-UV:** The column (4.6 mm × 250 mm) was eluted with a linear gradient of 20-60% acetonitrile (ACN) containing 0.1% TFA within 35 min at a flow rate of 1 mL/min.  $T_R = 12.764$  min.

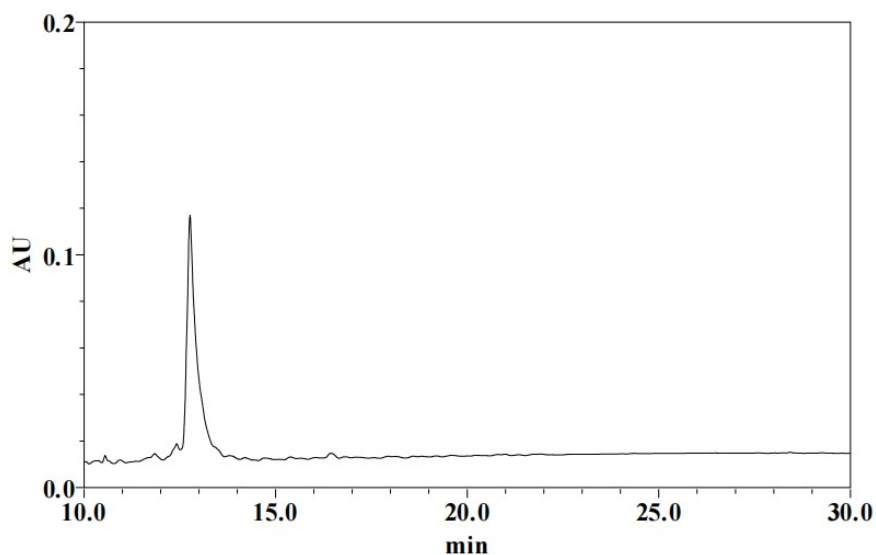

**MS:** calculated 4862.1347; found 4863.1389.

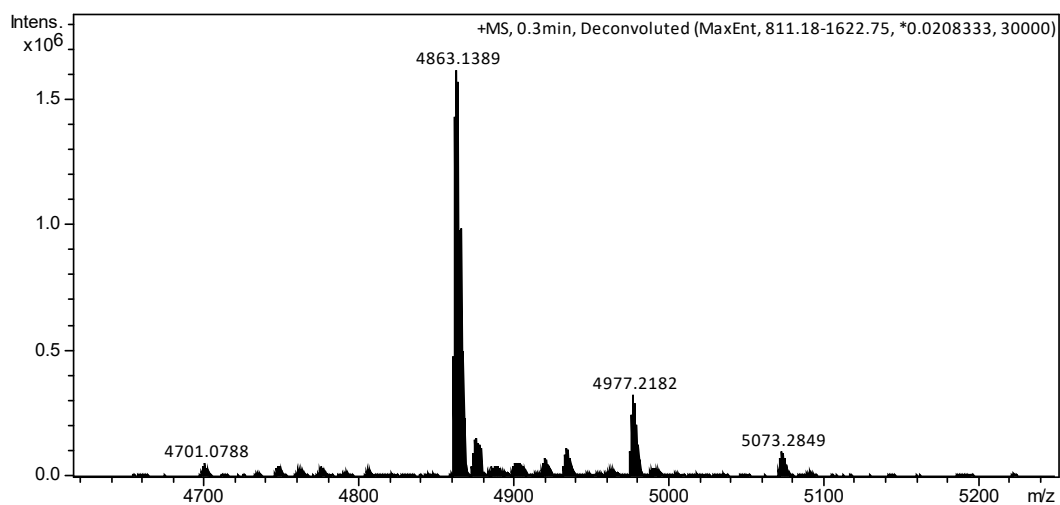

## Glycan-GLP-1-3(G2S2)

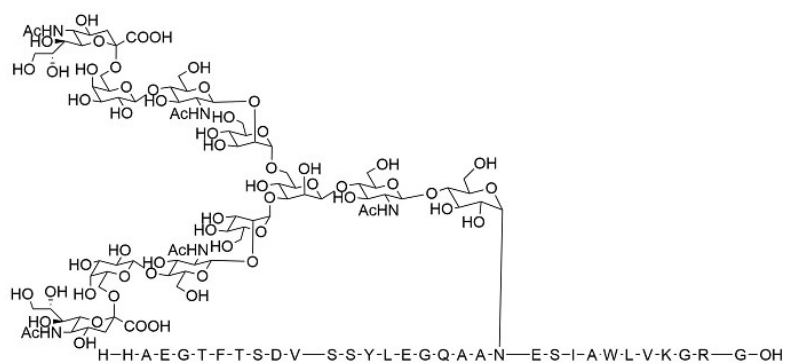

**HPLC-C18-UV:** The column (4.6 mm × 250 mm) was eluted with a linear gradient of 20-60% acetonitrile (ACN) containing 0.1% TFA within 35 min at a flow rate of 1 mL/min.  $T_R = 12.394$  min.

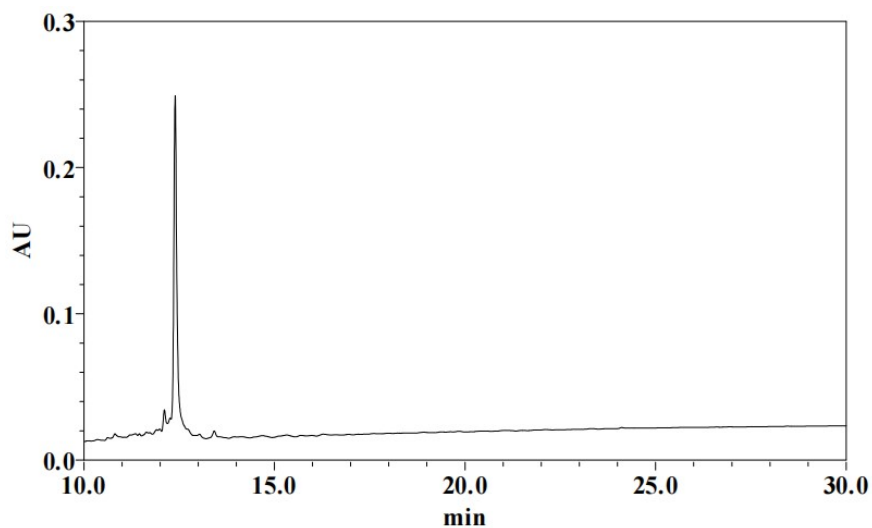

**MS:** calculated 5444.3255; found 5445.3584.

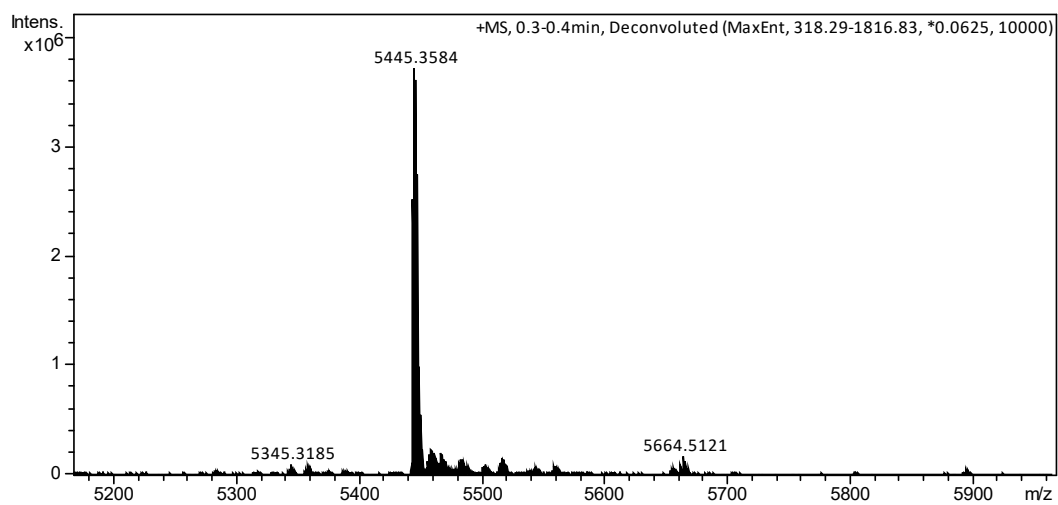

## Glc-GLP-1-5

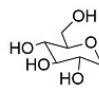

H-H-A-E-G-T-F-T-S-D-V-S-S-Y-L-E-G-Q-A-A-K-E-F-I-A-W-L-V-N-G-T-G-OH

**HPLC-C18-UV:** The column (4.6 mm × 250 mm) was eluted with a linear gradient of 20-60% acetonitrile (ACN) containing 0.1% TFA within 35 min at a flow rate of 1 mL/min.  $T_R = 19.384$  min.

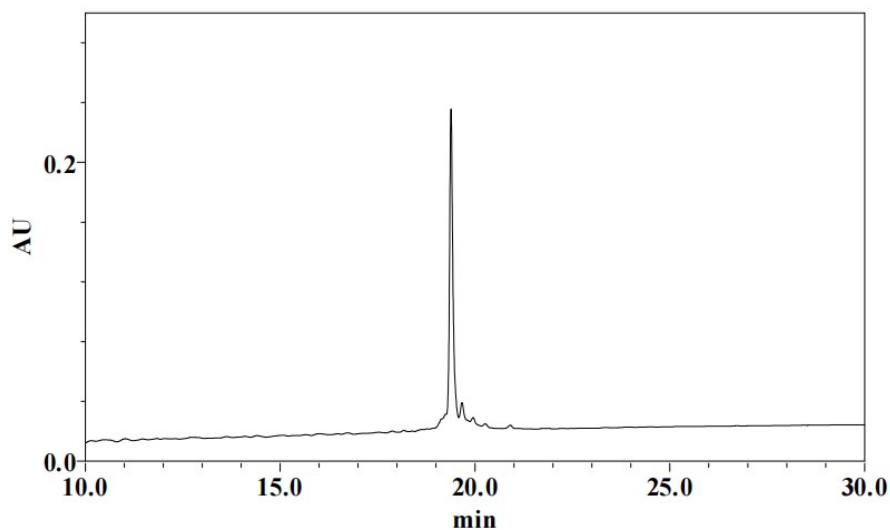

**MS:** calculated 3446.6154; found 3447.6287.

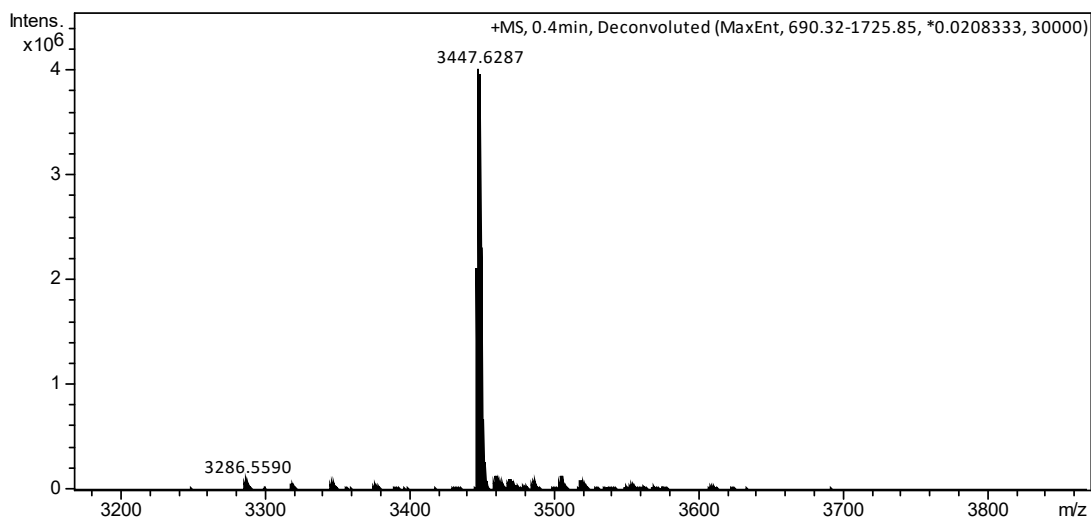



## Glycan-GLP-1-5(G2)

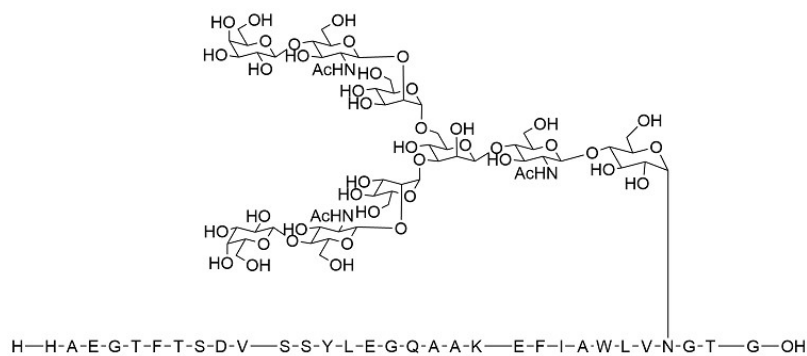

**HPLC-C18-UV:** The column (4.6 mm × 250 mm) was eluted with a linear gradient of 20-60% acetonitrile (ACN) containing 0.1% TFA within 35 min at a flow rate of 1 mL/min.  $T_R = 18.252$  min.

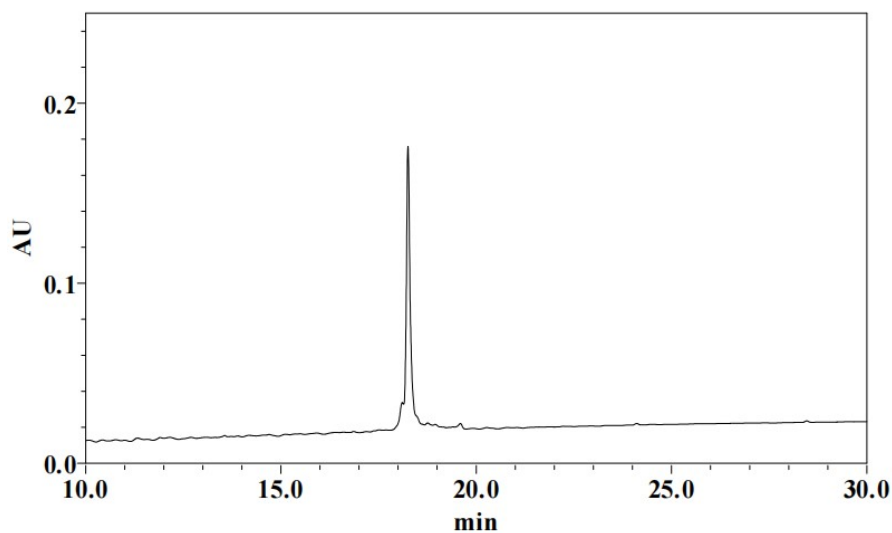

**MS:** calculated 4867.1176; found 4868.1329.

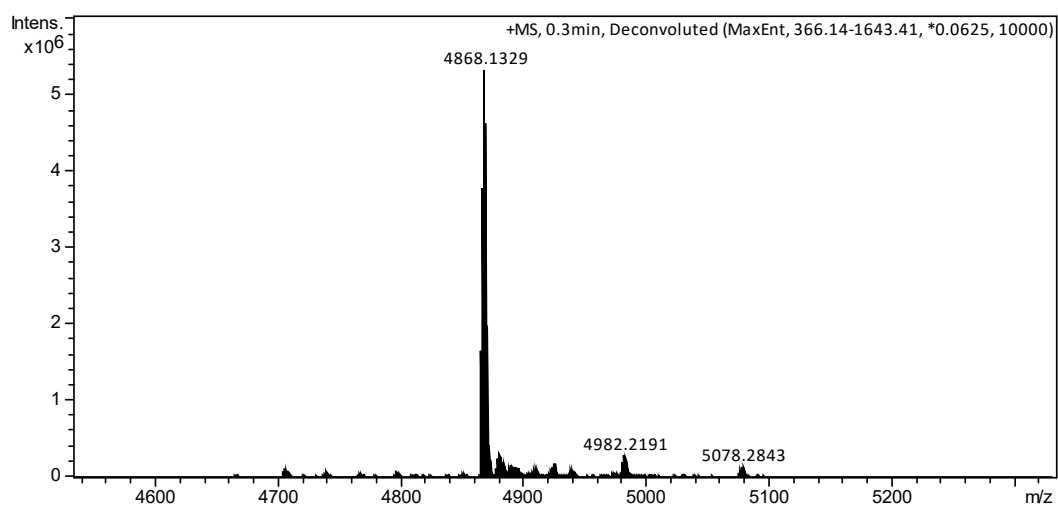

## Glycan-GLP-1-5(G2S2)

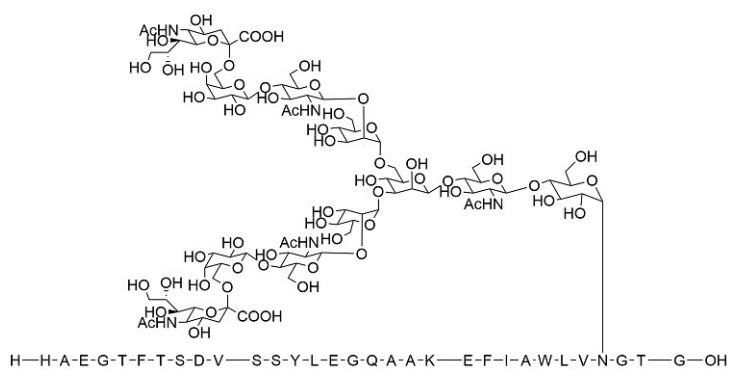

**HPLC-C18-UV:** The column (4.6 mm × 250 mm) was eluted with a linear gradient of 20-60% acetonitrile (ACN) containing 0.1% TFA within 35 min at a flow rate of 1 mL/min.  $T_R = 18.160$  min.

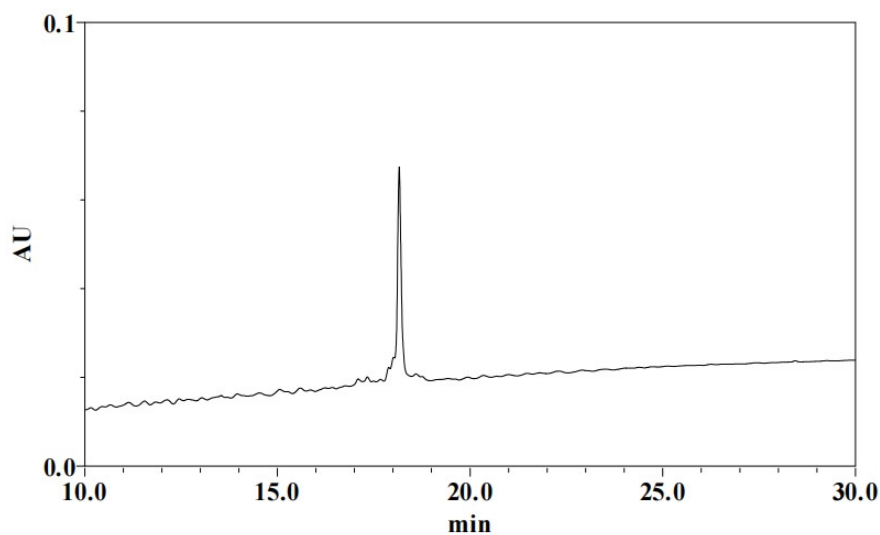

**MS:** calculated 5449.3085; found 5450.3383.

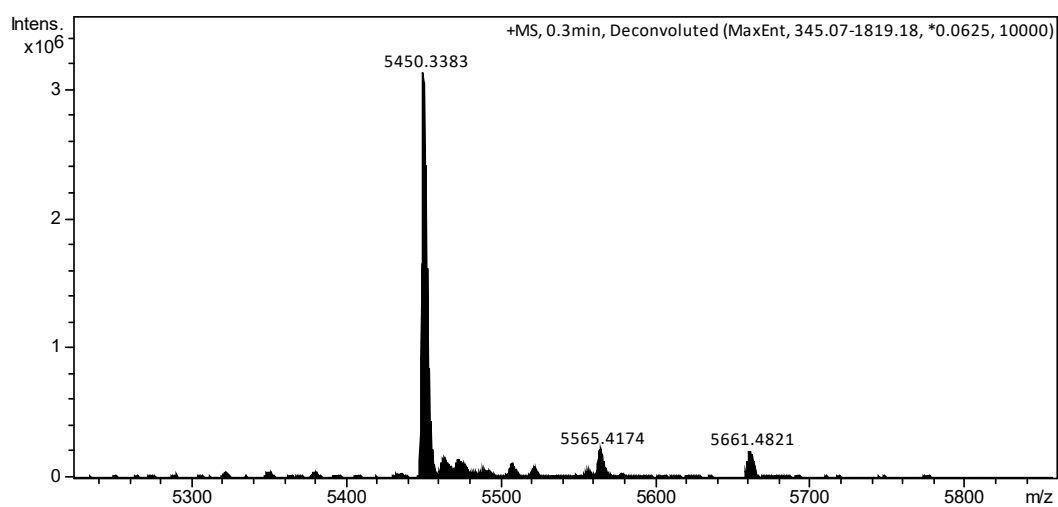

**Table S1** Retention times, theoretical and observed molecular weights of glycosylated GLP-1 analogues

| Peptide ID | Glycosylation site | Glycoform | Retention time (min) | ESI-MS analysis         |                       |
|------------|--------------------|-----------|----------------------|-------------------------|-----------------------|
|            |                    |           |                      | Calcd mass <sup>b</sup> | Observed <sup>c</sup> |
| 1          | 15N                | Glc       | 17.107               | 3514.74                 | 3515.47               |
|            |                    | G2        | 16.087               | 4935.24                 | 4936.25               |
|            |                    | G2S2      | 15.599               | 5517.43                 | 5518.45               |
| 2          | 16N                | Glc       | N.A. <sup>a</sup>    | 3531.74                 | N.A.                  |
| 3          | 26N                | Glc       | 13.345               | 3441.63                 | 3442.64               |
|            |                    | G2        | 12.764               | 4862.13                 | 4863.14               |
|            |                    | G2S2      | 12.394               | 5444.33                 | 5445.36               |
| 4          | 34N                | Glc       | N.A.                 | 3433.59                 | N.A.                  |
| 5          | 34N                | Glc       | 19.384               | 3446.62                 | 3447.63               |
|            |                    | G2        | 18.252               | 4867.12                 | 4868.13               |
|            |                    | G2S2      | 18.160               | 5449.31                 | 5450.34               |

<sup>a</sup> N.A.: Not applicable. <sup>b</sup> Molecular weight of free base. <sup>c</sup> [M+H]<sup>+</sup>.

**Table S2** The calculated ratio of secondary structure elements for native GLP-1 and glycan-GLP-1 analogues

| Variants             | $\alpha$ -helix | Antiparallel | Parallel | $\beta$ -turn | Radom coil |
|----------------------|-----------------|--------------|----------|---------------|------------|
| GLP-1                | 13.80%          | 43.00%       | 2.30%    | 20.70%        | 27.40%     |
| Glycan-GLP-1-1(G2)   | 13.70%          | 45.10%       | 2.30%    | 20.00%        | 26.90%     |
| Glycan-GLP-1-1(G2S2) | 13.80%          | 45.20%       | 2.20%    | 20.00%        | 26.80%     |
| Glycan-GLP-1-3(G2)   | 13.40%          | 45.80%       | 2.30%    | 19.90%        | 26.70%     |
| Glycan-GLP-1-3(G2S2) | 13.30%          | 46.20%       | 2.30%    | 19.70%        | 26.70%     |
| Glycan-GLP-1-5(G2)   | 13.50%          | 46.00%       | 2.30%    | 19.60%        | 26.80%     |
| Glycan-GLP-1-5(G2S2) | 13.40%          | 45.10%       | 2.20%    | 20.10%        | 26.90%     |

Fig. S2 Degradation profiles of GLP-1 isoforms incubated with DPP-IV

GLP-1

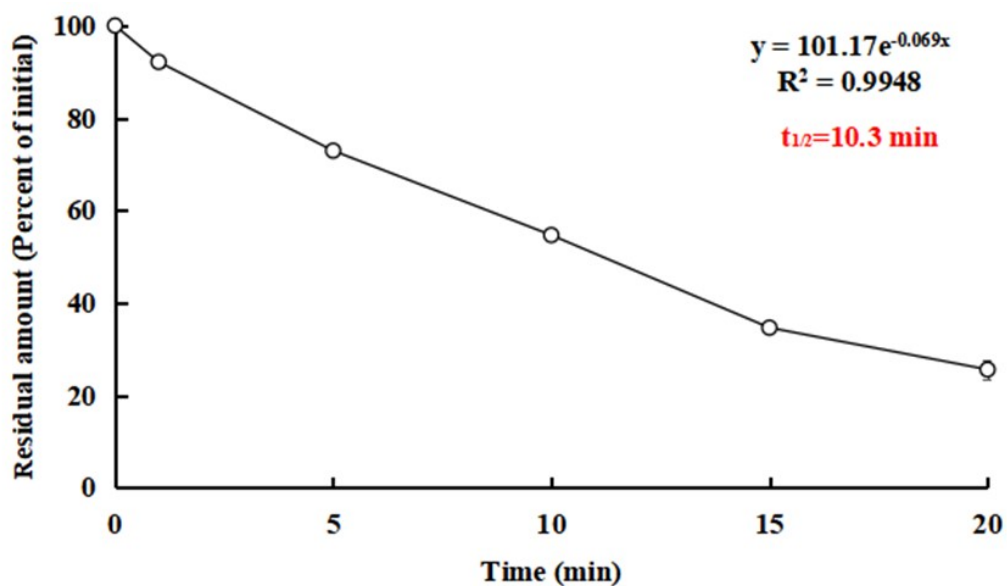

Glc-GLP-1-1

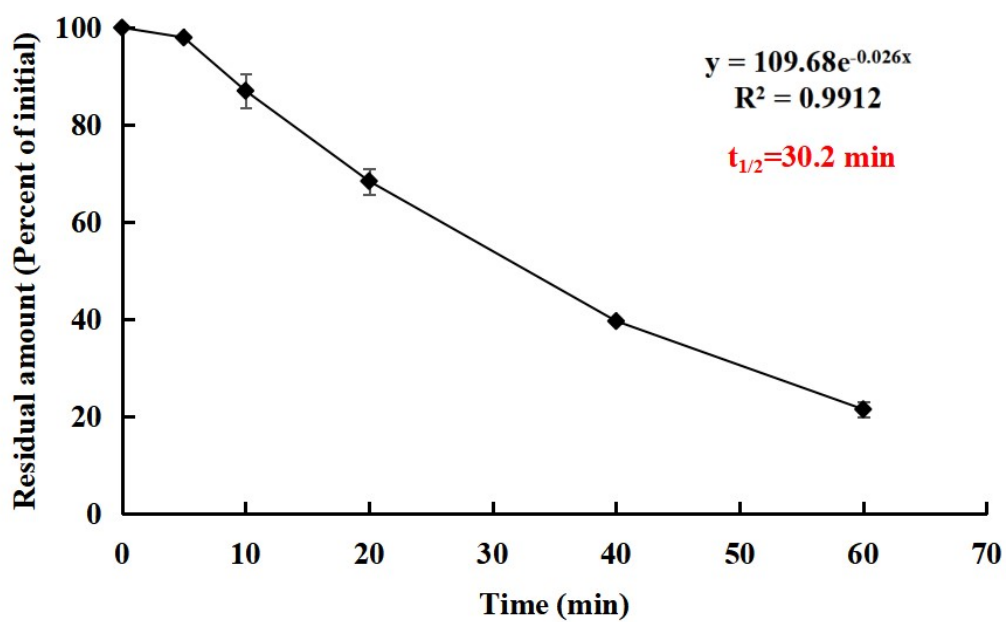

### Glc-GLP-1-3

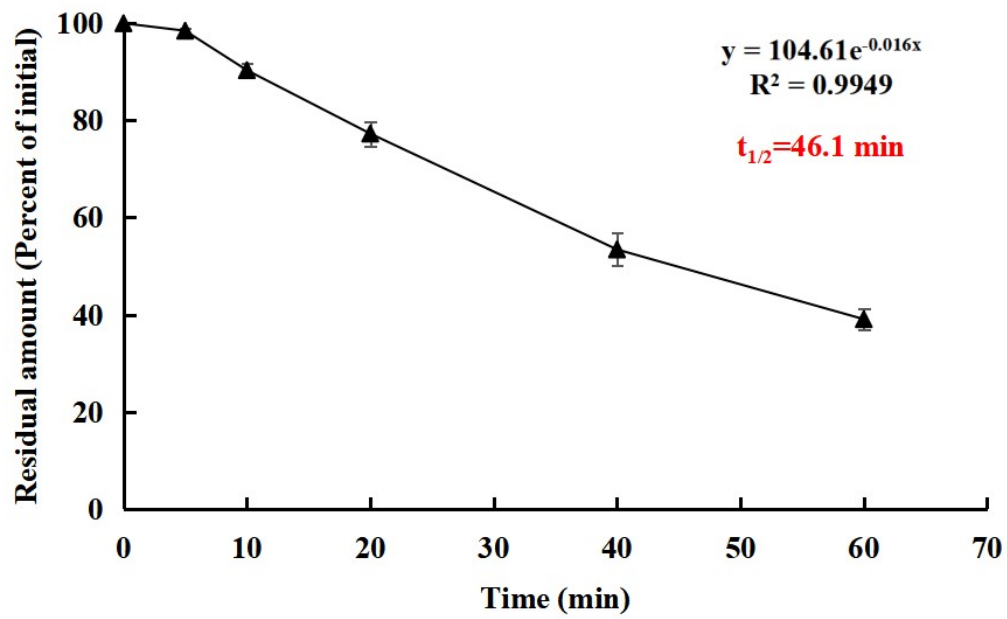

### Glc-GLP-1-5

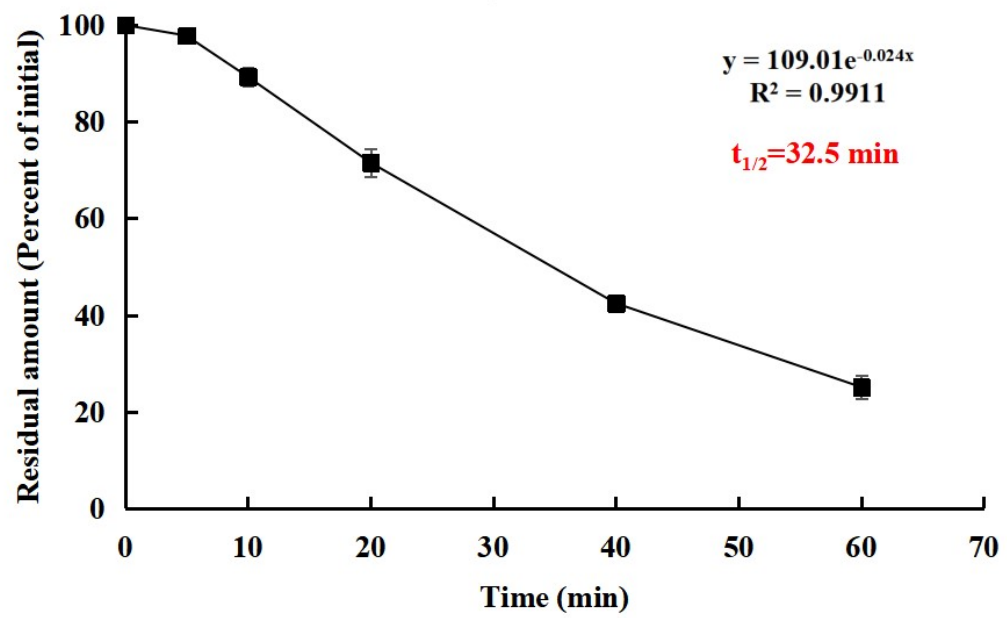

Glycan-GLP-1-1(G2)

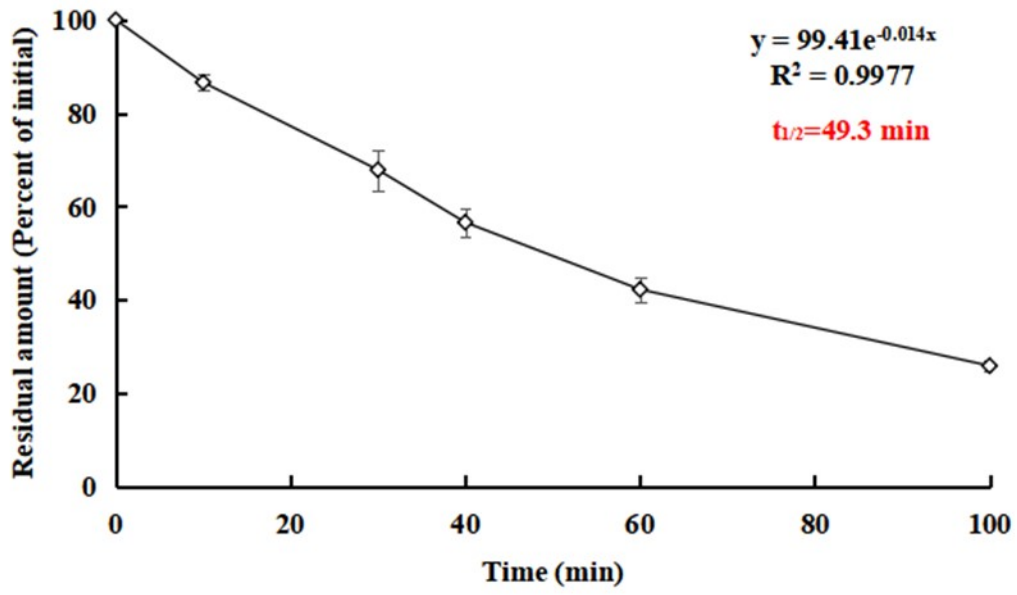

Glycan-GLP-1-1(G2S2)

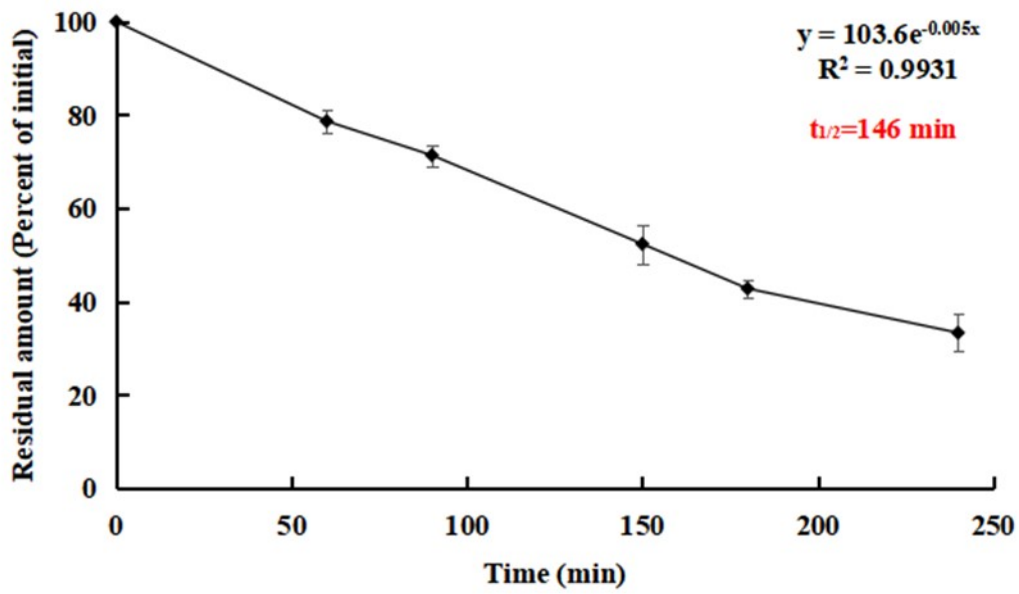

Glycan-GLP-1-3(G2)

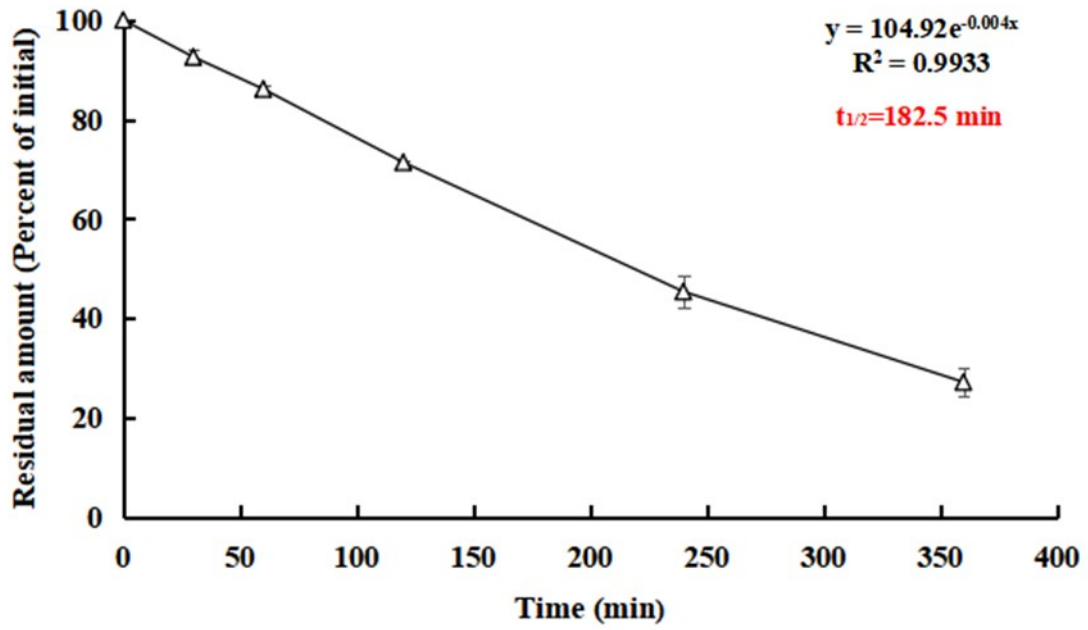

Glycan-GLP-1-3(G2S2)

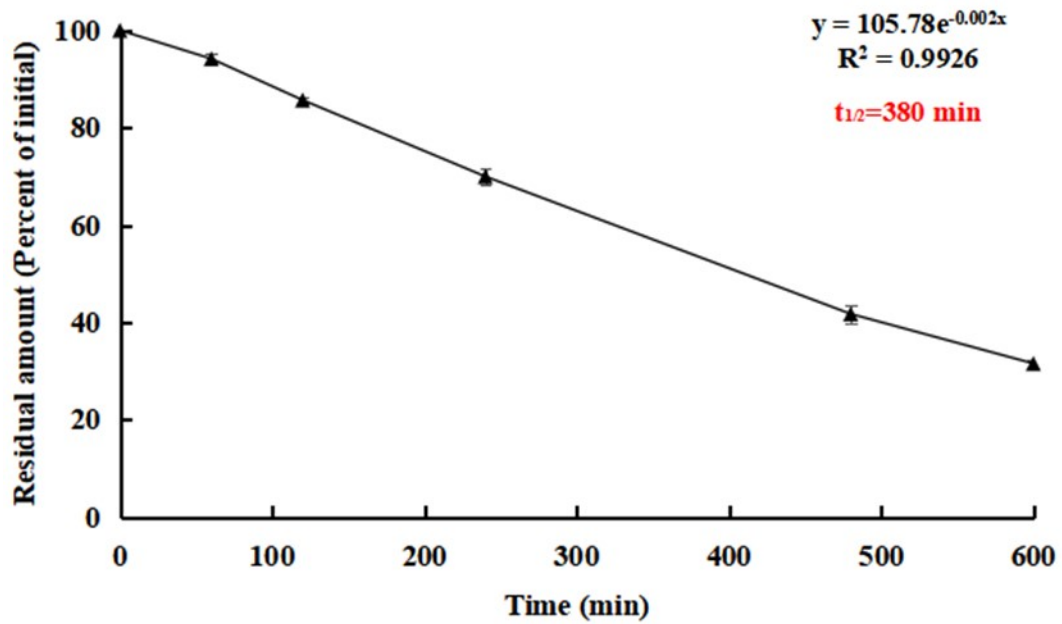

### Glycan-GLP-1-5(G2)

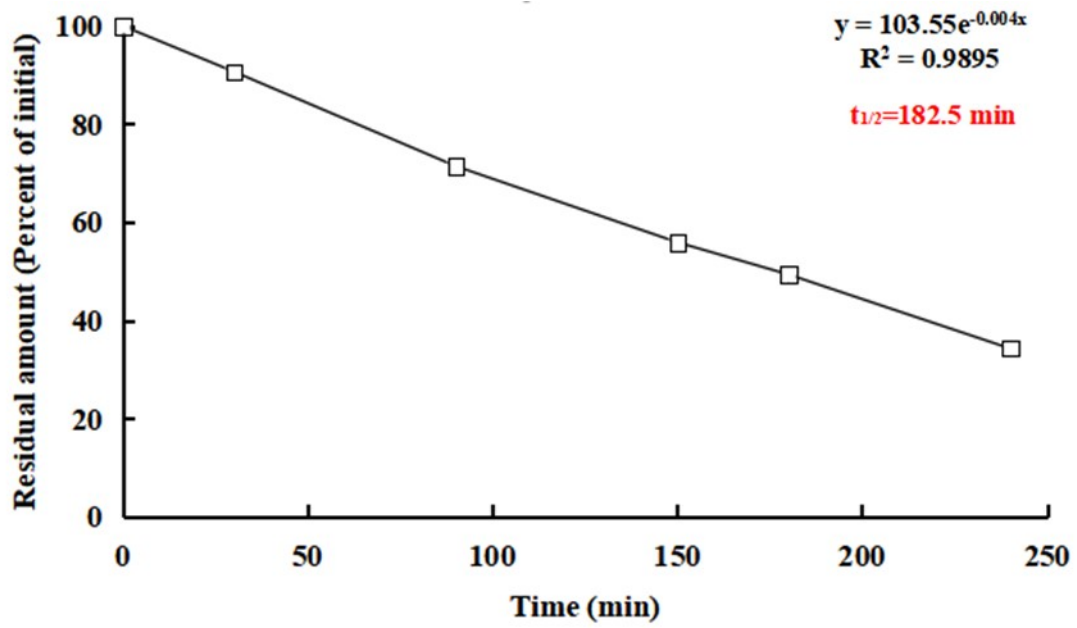

### Glycan-GLP-1-5(G2S2)

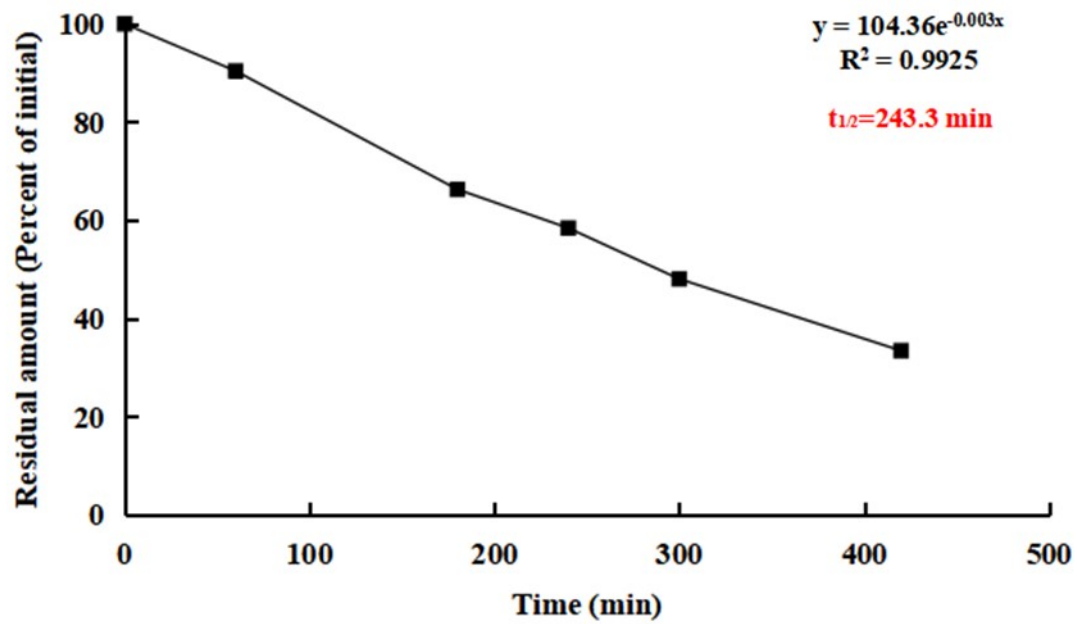



Fig. S3 Degradation profiles of GLP-1 isoforms incubated with mouse serum

GLP-1

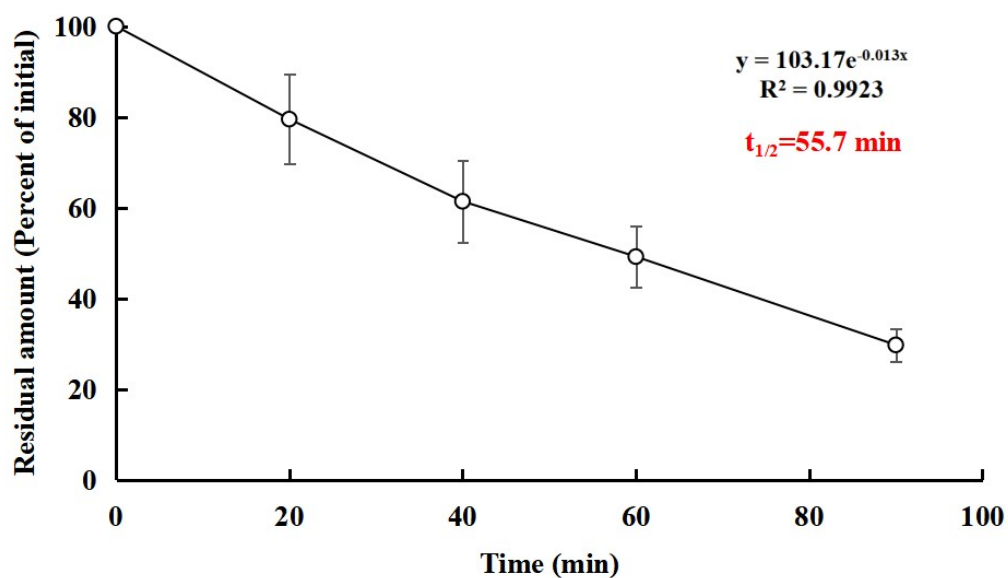

Glc-GLP-1-1

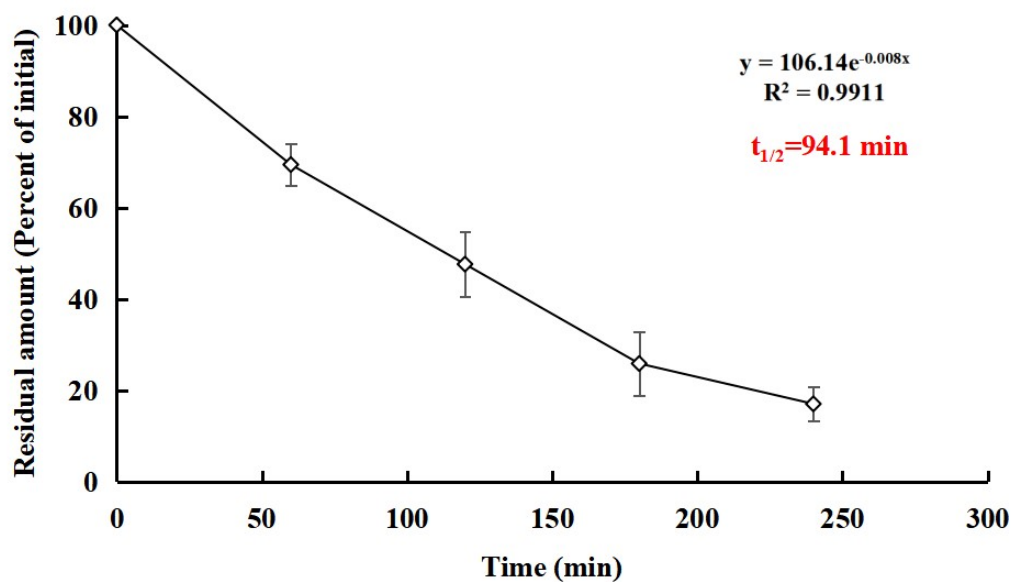

### Glc-GLP-1-3

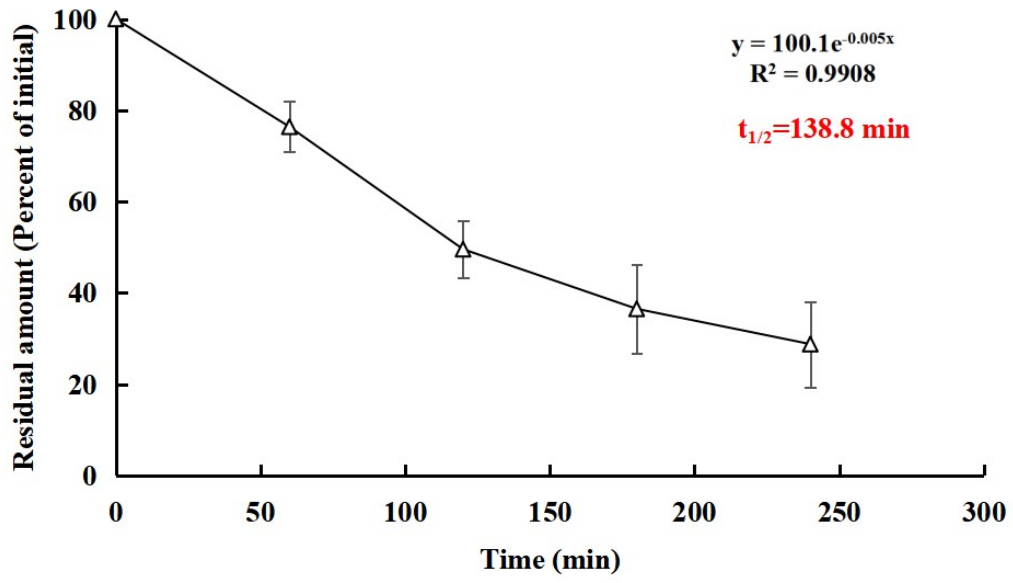

### Glc-GLP-1-5

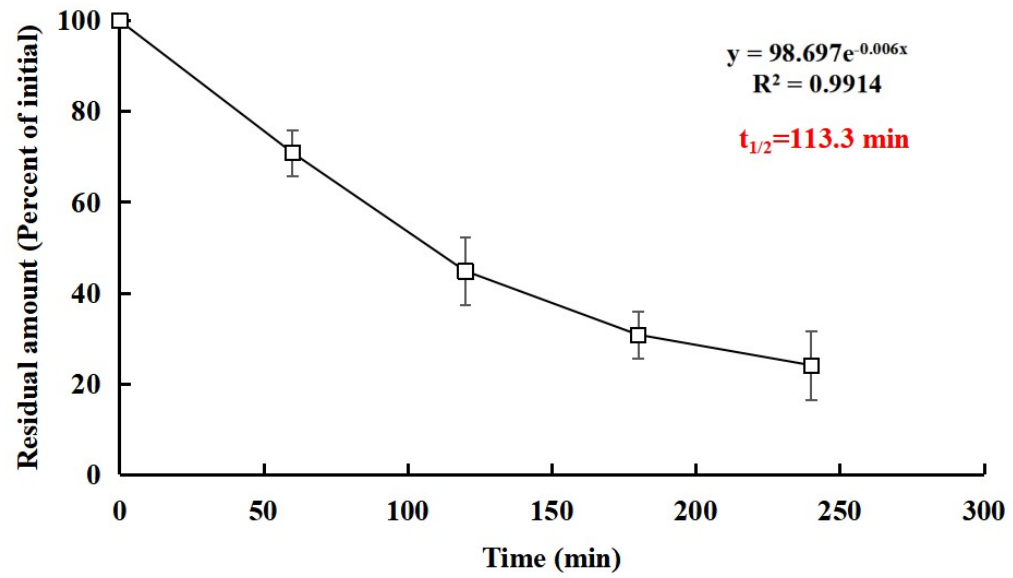

### Glycan-GLP-1-1(G2)

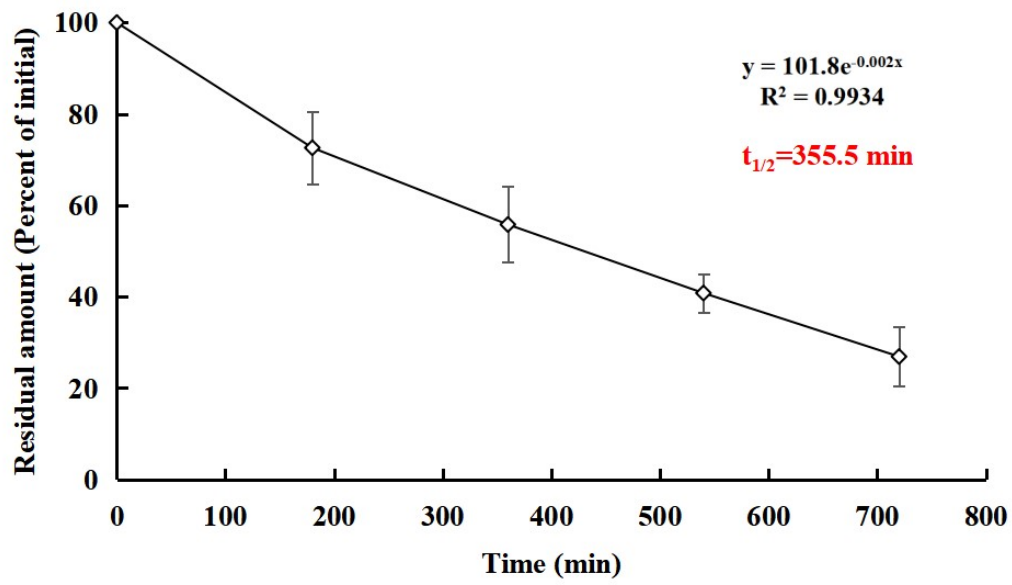

### Glycan-GLP-1-1(G2S2)

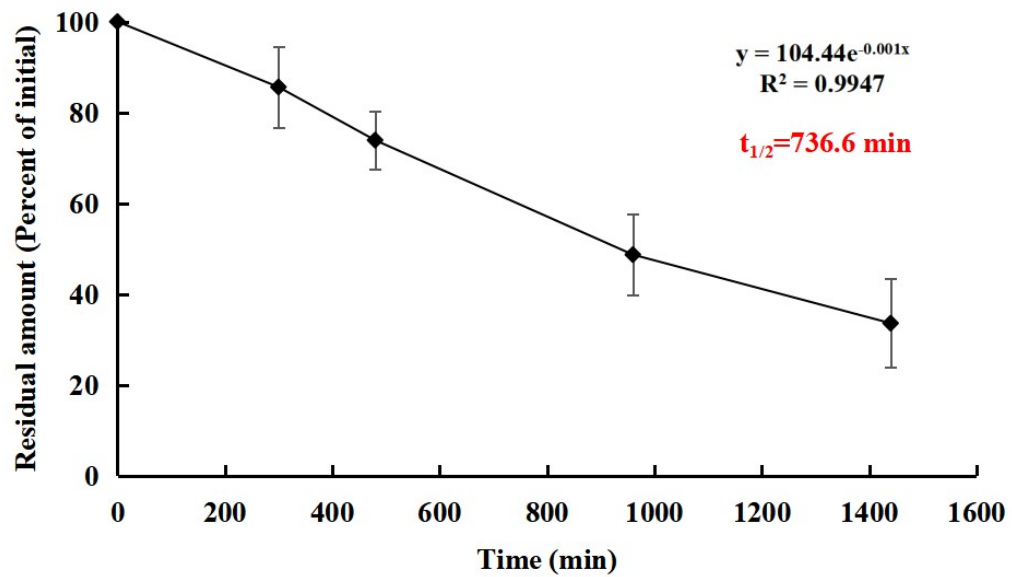

### Glycan-GLP-1-3(G2)

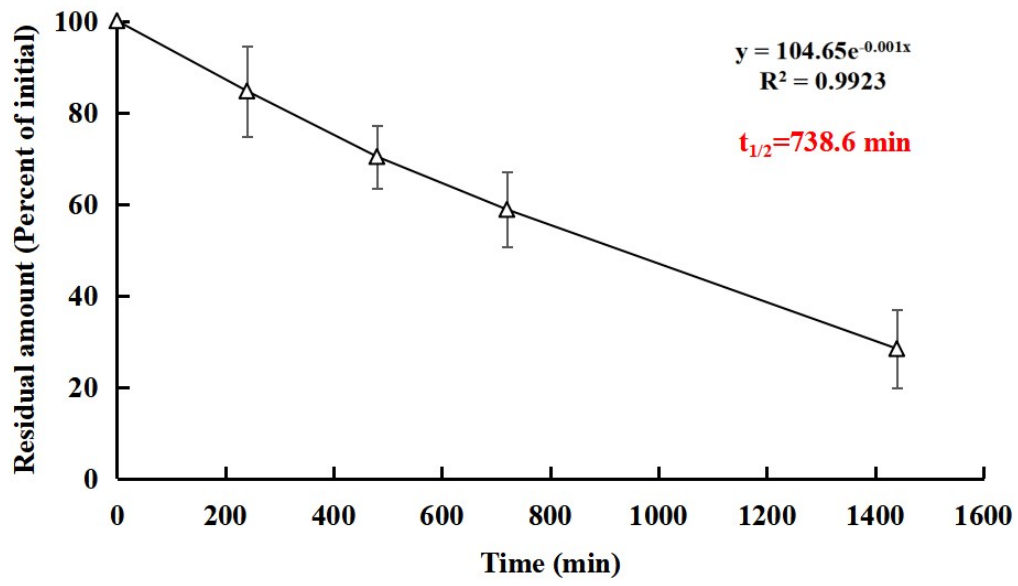

### Glycan-GLP-1-3(G2S2)

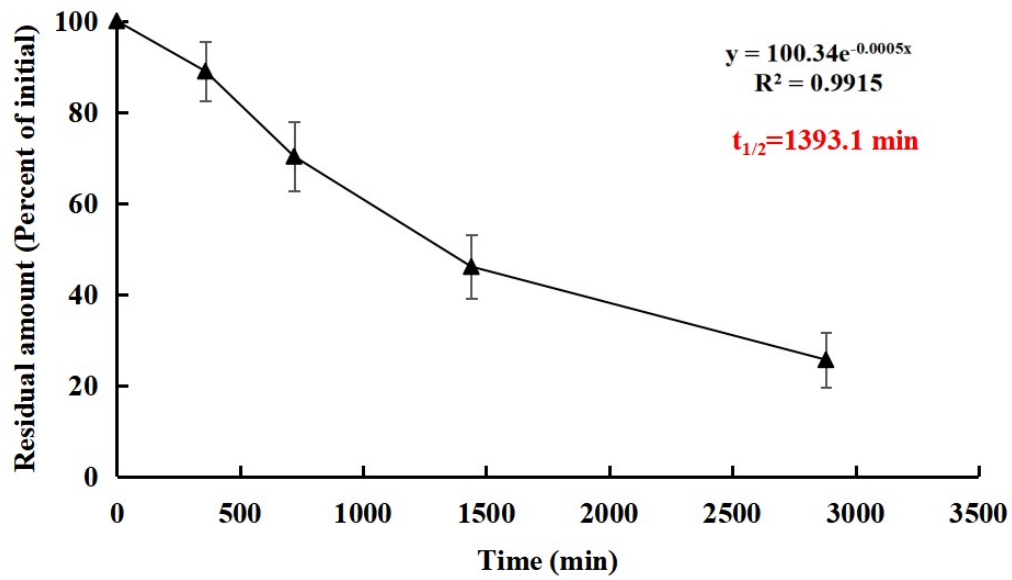

### Glycan-GLP-1-5(G2)

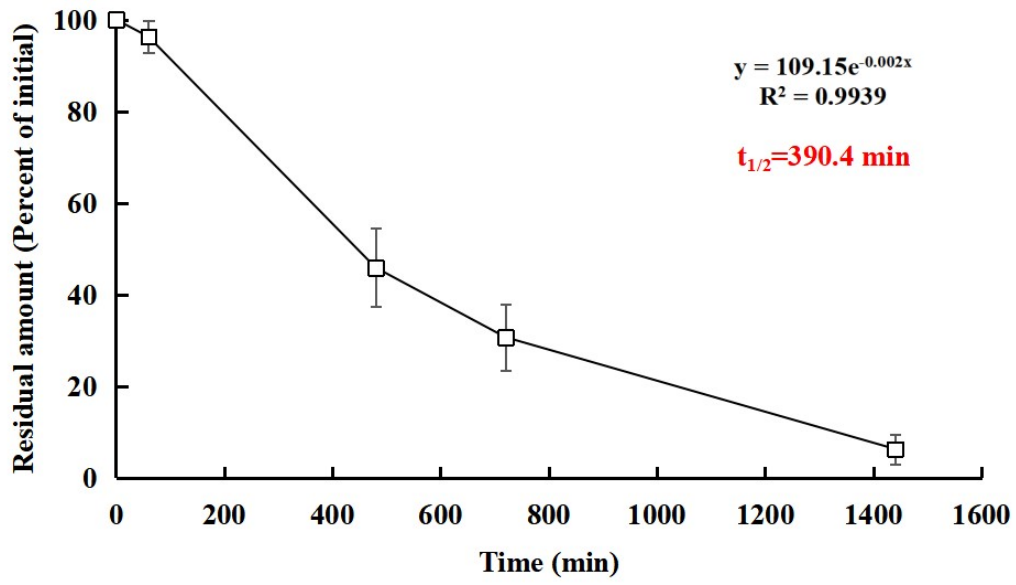

### Glycan-GLP-1-5(G2S2)

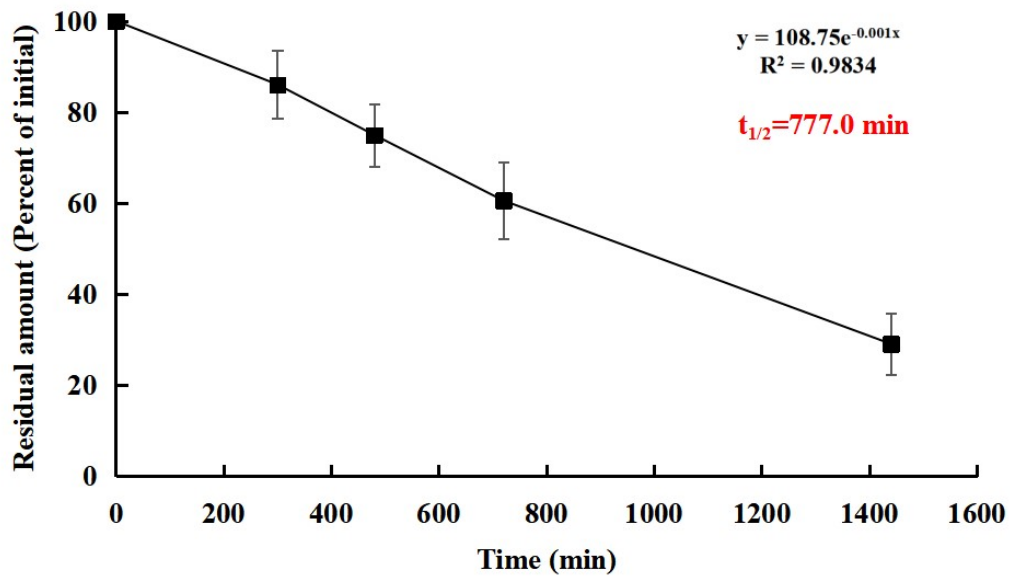

**Fig. S4** GLP-1-bound extracellular domain (ECD) of the GLP-1 receptor (GLP-1R) (derived from crystal structure of PDB ID: 3IOL)<sup>1</sup>. GLP-1R is shown in green while GLP-1 is in cyan. The amino acids at positions 15, 26 and 34 of GLP-1, which were glycosylated in this study, are highlighted in orange and shown as sticks.

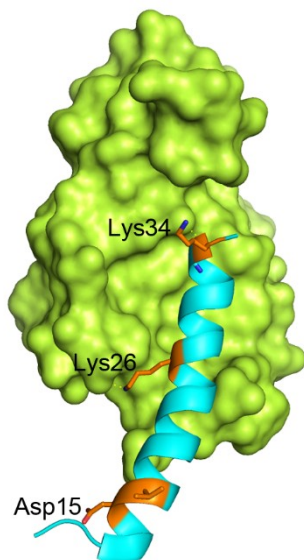

#### Reference

1. C. R. Underwood, P. Garibay, L. B. Knudsen, S. Hastrup, G. H. Peters, R. Rudolph and S. Reedtz-Runge, *J Biol Chem*, 2010, **285**, 723-730.
